# Supplementary material for: Adsorption Removal of Multiple Dyes Using Biogenic Selenium Nanoparticles from an Escherichia coli Strain Overexpressed Selenite Reductase CsrF
Source: PubMed Central journal article supplement (PMC5923564; doi:10.3390/nano8040234), 2018-04-12
Supplement: nanomaterials-08-00234-s001.pdf [file nanomaterials-08-00234-s001.pdf]

**Adsorption removal of multiple dyes using biogenic selenium nanoparticles from an *Escherichia coli* strain overexpressed selenite reductase CsrF**

Xian Xia, Zijie Zhou, Shijuan Wu, Dan Wang, Shixue Zheng, Gejiao Wang\*

State Key Laboratory of Agricultural Microbiology, College of Life Sciences and Technology, Huazhong Agricultural University, Wuhan, 430070,

P. R. China

\* To whom correspondence should be addressed.

Gejiao Wang.

Tel: +86 27 87281261.

Fax: +86 27 87280670.

E-mail: [gejiao@mail.hzau.edu.cn](mailto:gejiao@mail.hzau.edu.cn)

**Table S1** Parameter values of the kinetics models fitting to the experimental results for adsorption.

|                         | Dyes         | Congo red |          |          | Safranin T |          |          | Methylene blue |          |          |
|-------------------------|--------------|-----------|----------|----------|------------|----------|----------|----------------|----------|----------|
|                         | $C_0$ (mg/L) | 50        | 100      | 200      | 50         | 100      | 200      | 50             | 100      | 200      |
| First order             | $R^2$        | 0.9896    | 0.9883   | 0.9918   | 0.9692     | 0.9546   | 0.955    | 0.9989         | 0.9998   | 0.9996   |
|                         | $k_1$        | 0.3443    | 0.2252   | 0.088    | 0.21486    | 0.1778   | 0.1228   | 0.4819         | 0.8016   | 0.7282   |
|                         | $q_e$ (mg/g) | 122.3874  | 225.6526 | 404.5659 | 51.3773    | 132.5186 | 208.8018 | 119.8046       | 240.1069 | 479.0459 |
| Second order            | $R^2$        | 0.999     | 0.9991   | 0.9984   | 0.9962     | 0.9901   | 0.9584   | 0.9996         | 0.9999   | 0.9999   |
|                         | $k_2$        | 0.0062    | 0.0017   | 0.0002   | 0.0065     | 0.0019   | 0.0007   | 0.0146         | 0.0339   | 0.0115   |
|                         | $q_e$ (mg/g) | 128.2158  | 243.0198 | 480.3693 | 55.8186    | 146.2223 | 237.6316 | 122.4501       | 241.4132 | 482.8749 |
| Intraparticle diffusion | $R^2$        | 0.7697    | 0.7608   | 0.9047   | 0.9205     | 0.9338   | 0.6838   | 0.5588         | 0.74327  | 0.8294   |
|                         | $k_3$        | 3.6569    | 11.1039  | 42.7581  | 2.9222     | 9.0313   | 17.61    | 1.5704         | 0.8428   | 2.5099   |
|                         | $c$          | 100.6528  | 156.5418 | 110.1183 | 33.46762   | 76.2189  | 91.6559  | 110.4062       | 235.2992 | 464.7706 |

**Table S2** Langmuir, Freundlich and Temkin adsorption isotherm constant, correlation coefficient and  $q_m$ .

| Dyes       | Congo red       |           |           | Safranin T |            |            | Methylene blue |           |           |           |
|------------|-----------------|-----------|-----------|------------|------------|------------|----------------|-----------|-----------|-----------|
|            | Temperature (K) | 303       | 313       | 323        | 303        | 313        | 323            | 303       | 313       | 323       |
| Langmuir   | $R^2$           | 0.9743    | 0.9518    | 0.9722     | 0.9909     | 0.9788     | 0.9836         | 0.9835    | 0.9437    | 0.9705    |
|            | $K_L$ (L/mg)    | 0.0071    | 0.00715   | 0.00736    | 0.00139    | 0.0015     | 0.00162        | 0.0937    | 0.10323   | 0.11572   |
|            | $q_m$ (mg/g)    | 1072.1224 | 1337.0217 | 1577.7388  | 1369.6945  | 1671.7905  | 1911.0299      | 1363.3269 | 1587.2356 | 1792.1568 |
| Freundlich | $R^2$           | 0.9258    | 0.9459    | 0.9247     | 0.9652     | 0.9303     | 0.9361         | 0.8356    | 0.725     | 0.7731    |
|            | $K_F$ (mg/g)    | 97.5378   | 117.6155  | 132.6498   | 16.5630    | 20.8831    | 26.1396        | 546.9868  | 655.5122  | 720.3662  |
|            | $n$             | 2.9285    | 2.8706    | 2.7975     | 1.7924     | 1.7914     | 1.8182         | 6.7682    | 6.9686    | 6.6489    |
| Temkin     | $R^2$           | 0.9632    | 0.9479    | 0.9552     | 0.9716     | 0.9745     | 0.9829         | 0.9105    | 0.8012    | 0.8551    |
|            | $A$             | -565.7184 | -592.6483 | -777.6358  | -1130.5648 | -1500.5638 | -1702.2231     | 333.0497  | 414.798   | 460.1529  |
|            | $B$             | 223.9262  | 260.9136  | 322.5697   | 277.3888   | 361.0862   | 415.6558       | 167.6103  | 191.8999  | 221.9619  |
